# Supplementary material for: Microelectromechanical-system-based condensation particle counter for real-time monitoring of airborne ultrafine particles
Source: Copernicus journal article supplement (doi:10.5194/amt-12-5335-2019), 2019-10-08
Supplement: Supplementary file 1 [file amt-12-5335-2019-supplement.zip]

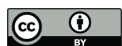

## *Supplement of*

# **Microelectromechanical-system-based condensation particle counter for real-time monitoring of airborne ultrafine particles**

**Seong-Jae Yoo et al.**

*Correspondence to:* Yong-Jun Kim (yjk@yonsei.ac.kr)

- [amt-12-5335-2019-supplement-title-page.pdf](#)
- [Supplemental material.docx](#)
- [Supplemental material.pdf](#)

The copyright of individual parts of the supplement might differ from the CC BY 4.0 License.
