# Supplementary material for: Microelectromechanical-system-based condensation particle counter for real-time monitoring of airborne ultrafine particles
Source: Copernicus journal article supplement (doi:10.5194/amt-12-5335-2019), 2019-10-08
Supplement: Supplementary file 2 [file amt-12-5335-2019-supplement.zip]

Archive with 3 entries (3 files):
- Supplemental material.docx
- Supplemental material.pdf
- amt-12-5335-2019-supplement-title-page.pdf
