# Supplementary material for: Microelectromechanical-system-based condensation particle counter for real-time monitoring of airborne ultrafine particles
Source: Copernicus journal article supplement (doi:10.5194/amt-12-5335-2019), 2019-10-08
Supplement: Supplementary file 2 [file amt-12-5335-2019-supplement.zip › Supplemental material.docx]

***Supplemental material***

**Microelectromechanical system-based condensation particle counter for real-time monitoring of airborne ultrafine particles**

**Seong-Jae Yoo, Hong-Beom Kwon, Ui-Seon Hong, Dong-Hyun Kang, Sang-Myun Lee, Jangseop Han, Jungho Hwang, Yong-Jun Kim***

School of Mechanical Engineering, Yonsei University, Seoul, 03722, Republic of Korea

Micro Nano Fab Center, Korea Institute of Science and Technology, Seoul, 02792, Republic of Korea

* To whom correspondence should be addressed: yjk@yonsei.ac.kr

**[Channel geometry information]**


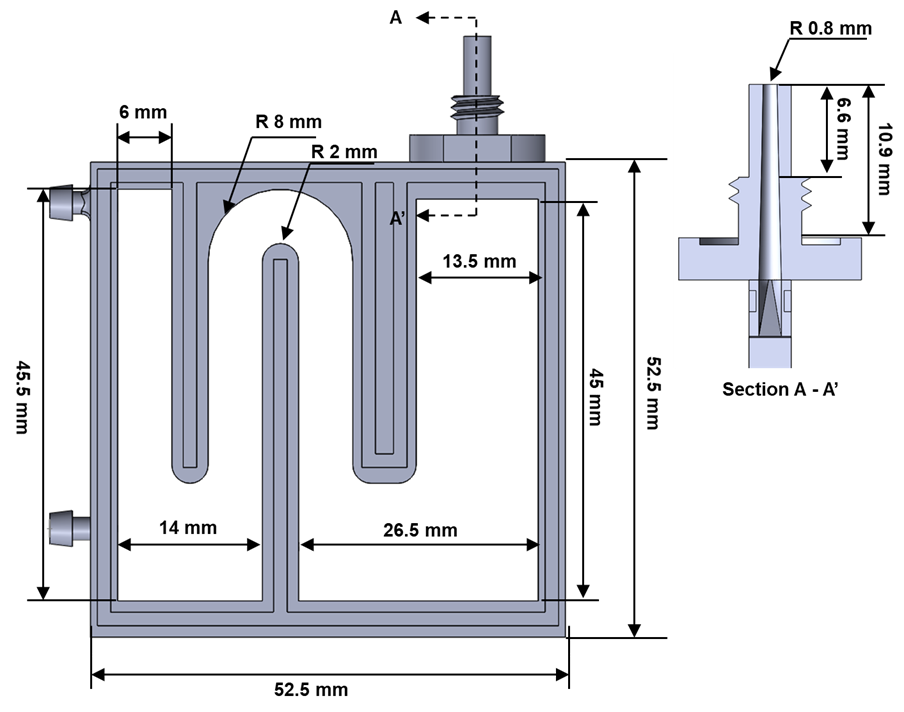


**Figure S1** The geometry parameters of the MEMS-based condensation chip.

**[Component and price information of the MEMS based CPC]**

| Components | | Used material | Manufacturer | Retail price | Used quantity | Price ($) |
| --- | --- | --- | --- | --- | --- | --- |
| 3D printed channel | | SLA  (Stereolithography Apparatus) | 3D MON, KR | 10 $ / EA | 1 | 10 |
| Integrated  glass slide | Glass | Sodalime glass | SEMISTORE, KR | 3 $ / EA | 2 EA | 6 |
| electrodes | AZ GXR-601 Photoresist | Microchem, USA | 420 $ / 3.8 L | 5 ml | 0.55 |
| MIF-300 developer | Microchem, USA | 170 $ / 20 L | 200 ml | 1.7 |
| Micropillar wick | SU-8 2100 photoresist | Microchem, USA | 840 $ / 500 ml | 5 ml | 8.4 |
| SU-8 developer | Microchem, USA | 336 $ / 3.8 L | 100 ml | 8.8 |

**Table S1** Material used for manufacturing a single MEMS-based particle growth system.
