# Supplementary material for: Microelectromechanical-system-based condensation particle counter for real-time monitoring of airborne ultrafine particles
Source: Copernicus journal article supplement (doi:10.5194/amt-12-5335-2019), 2019-10-08
Supplement: Supplementary file 2 [file amt-12-5335-2019-supplement.zip › Supplemental material.pdf]

5

## *Supplemental material*

10

# **Microelectromechanical system-based condensation particle counter for real-time monitoring of airborne ultrafine particles**

**Seong-Jae Yoo, Hong-Beom Kwon, Ui-Seon Hong, Dong-Hyun Kang, Sang-Myun Lee, Jangseop Han, Jungho Hwang, Yong-Jun Kim\***

15

School of Mechanical Engineering, Yonsei University, Seoul, 03722, Republic of Korea

Micro Nano Fab Center, Korea Institute of Science and Technology, Seoul, 02792, Republic of Korea

\* To whom correspondence should be addressed: yjk@yonsei.ac.kr

[Channel geometry information]

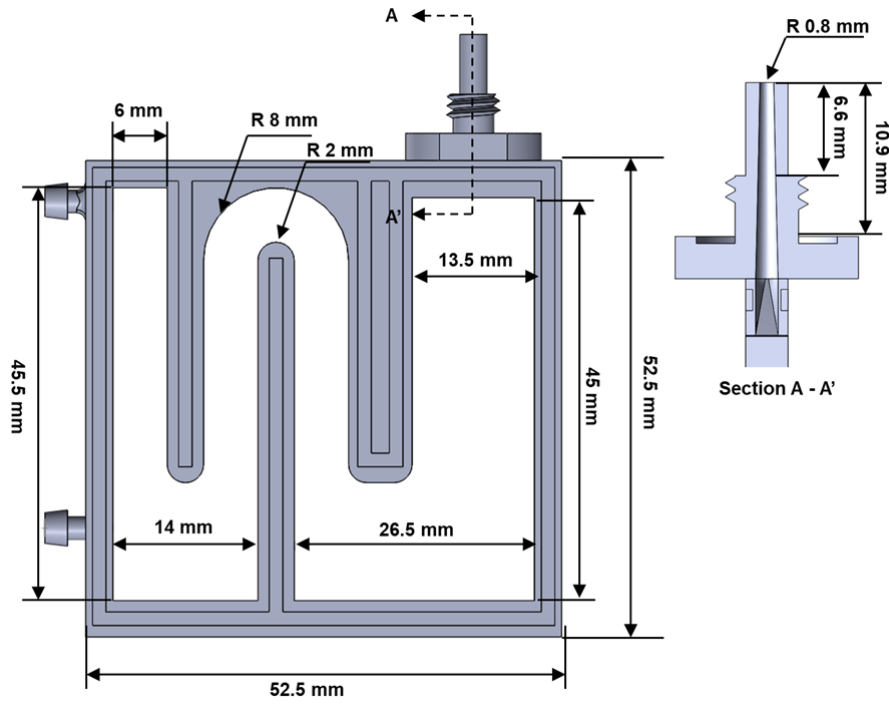

**Figure S1** The geometry parameters of the MEMS-based condensation chip.

## [Component and price information of the MEMS based CPC]

| Components                |                  | Used material                        | Manufacturer   | Retail price    | Used quantity | Price (\$) |
|---------------------------|------------------|--------------------------------------|----------------|-----------------|---------------|------------|
| 3D printed channel        |                  | SLA<br>(Stereolithography Apparatus) | 3D MON, KR     | 10 \$ / EA      | 1             | 10         |
| Integrated<br>glass slide | Glass            | Sodalime glass                       | SEMISTORE, KR  | 3 \$ / EA       | 2 EA          | 6          |
|                           | electrodes       | AZ GXR-601 Photoresist               | Microchem, USA | 420 \$ / 3.8 L  | 5 ml          | 0.55       |
|                           |                  | MIF-300 developer                    | Microchem, USA | 170 \$ / 20 L   | 200 ml        | 1.7        |
|                           | Micropillar wick | SU-8 2100 photoresist                | Microchem, USA | 840 \$ / 500 ml | 5 ml          | 8.4        |
|                           |                  | SU-8 developer                       | Microchem, USA | 336 \$ / 3.8 L  | 100 ml        | 8.8        |

**Table S1** Material used for manufacturing a single MEMS-based particle growth system.
